# Supplementary material for: Effect of Fluoroquinolone Use in Primary Care on the Development and Gradual Decay of Escherichia coli Resistance to Fluoroquinolones: A Matched Case-Control Study
Source: MDPI journal article supplement (doi:10.3390/antibiotics11060822), 2022-06-18
Supplement: s1 [file s1]

**Supplementary Table S1.** Codes for exposure

| ATC     | 3GC           |
|---------|---------------|
| J01MA02 | Ciprofloxacin |
| J01MA06 | Norfloxacin   |
| J01MA12 | Levofloxacin  |

**Abbreviations.** ATC = Anatomical therapeutic class; FQs = fluoroquinolones

**Supplementary Table S2.** Codes for considered comorbidities

| Comorbidity       | ATC             | ICD-9-CM                                                                    |
|-------------------|-----------------|-----------------------------------------------------------------------------|
| Cancer            | L01, L02A, L02B | 140, 208                                                                    |
| Diabetes          | A10             | 250                                                                         |
| COPD              | R03BB           | 490, 491.1, 491.20, 491.21, 491.22, 491.8, 491.9, 492.0, 492.8, 493.22, 496 |
| AIDS              | J05A            | 42                                                                          |
| Immunosuppression |                 | 279 (except 279.4)                                                          |
| Haemodialysis     |                 | 399.5, 549.8, 392.7                                                         |

**Abbreviations.** ATC = Anatomical therapeutic class; ICD-9-CM = International Classification of Diseases, Ninth Revision, Clinical Modification, AIDS = Acute immune deficiency syndrome; COPD = Chronic obstructive pulmonary disorder.

**Supplementary Table S3.** Sensitivity analysis performed excluding all patients who received at least one prescription of antibiotics in the 15 days preceding the ID

| Variable                                                 |          | Cases<br>N=375 | Controls<br>N=917 | Adjusted OR<br>(95% CI)         | P                 |
|----------------------------------------------------------|----------|----------------|-------------------|---------------------------------|-------------------|
| FQ prescriptions in previous year (%)                    | 0        | 248 (66.13)    | 785 (85.61)       | <i>Ref.</i>                     | <i>Ref.</i>       |
|                                                          | 1        | 61 (16.27)     | 72 (7.85)         | <b>2.50 (1.68 – 3.72)</b>       | <b>&lt;0.0001</b> |
|                                                          | 2        | 31 (8.27)      | 34 (3.71)         | <b>2.46 (1.45 – 4.17)</b>       | <b>0.001</b>      |
|                                                          | 3+       | 35 (9.33)      | 26 (2.84)         | <b>3.75 (2.09 – 6.74)</b>       | <b>&lt;0.0001</b> |
| At least one other J01 prescription in previous year (%) |          | 174 (46.40)    | 306 (33.37)       | 1.19 (0.90-1.56)                | 0.221             |
| Age, Median (IQ)                                         |          | 78 (68-86)     | 75 (59-84)        | 1.11 <sup>a</sup> (1.03 – 1.96) | 0.007             |
| Gender, Male (%)                                         |          | 253 (61.86)    | 399 (42.77)       | 1.45 (1.09 – 1.91)              | 0.010             |
| Hospitalization days, Median (IQ)                        |          | 47 (12-116)    | 9 (0-90)          | 1.05 <sup>b</sup> (1.04-1.07)   | <0.0001           |
| Diagnosis of chronic diseases (%)                        | Diabetes | 100 (26.67)    | 145 (15.81)       | 1.41 (1.02 – 1.94)              | 0.032             |
|                                                          | COPD     | 148 (39.47)    | 236 (25.74)       | 1.49 (1.12 – 1.99)              | <0.0001           |

<sup>a</sup>OR calculated for 10-year increments; <sup>b</sup>OR calculated for 10-day increments

**Abbreviations.** ID = index date; FQ = fluoroquinolone; IQ = interquartile range; COPD = chronic obstructive pulmonary disease; QREC = Quinolone-Resistant *E. coli*

**Supplementary Table S4.** Sensitivity analysis performed excluding all patients with a bacterial culture performed after 48 hours of hospital admission

| Variable                                                 |    | Cases<br>N=135 | Controls<br>N=287 | Adjusted OR<br>(95% CI)         | P            |
|----------------------------------------------------------|----|----------------|-------------------|---------------------------------|--------------|
| FQ prescriptions in previous year (%)                    | 0  | 87 (64.44)     | 232 (81.12)       | <i>Ref.</i>                     | <i>Ref.</i>  |
|                                                          | 1  | 20 (14.81)     | 38 (13.29)        | <b>0.48 (0.15 – 1.37)</b>       | <b>0.159</b> |
|                                                          | 2  | 15 (11.11)     | 8 (2.80)          | <b>2.30 (0.34 – 15.76)</b>      | <b>0.395</b> |
|                                                          | 3+ | 13 (9.63)      | 8 (2.80)          | <b>18.78 (1.69 – 208.77)</b>    | <b>0.017</b> |
| At least one other J01 prescription in previous year (%) |    | 68 (50.37)     | 107 (37.41)       | 0.80 (0.35-1.86)                | 0.613        |
| Age, Median (IQ)                                         |    | 81 (71-86)     | 75 (59-85)        | 1.13 <sup>a</sup> (0.87 – 1.48) | 0.353        |

|                                         |          |            |            |                    |       |
|-----------------------------------------|----------|------------|------------|--------------------|-------|
| Gender, Male (%)                        |          | 44 (38.94) | 69 (61.06) | 2.47 (0.78 – 7.84) | 0.126 |
| Number of hospitalizations, Median (IQ) |          | 5 (2-9)    | 2 (0-4)    | 1.18 (1.06-1.32)   | 0.002 |
| Diagnosis of chronic diseases (%)       | Diabetes | 39 (28.89) | 47 (16.43) | 2.11 (0.76 – 5.82) | 0.150 |
|                                         | COPD     | 63 (46.67) | 76 (26.57) | 1.94 (0.71 – 5.28) | 0.196 |

<sup>a</sup>OR calculated for 10-year increments

**Abbreviations.** ID = index date; FQ = fluoroquinolone; IQ = interquartile range; COPD = chronic obstructive pulmonary disease; QREC = Quinolone-Resistant *E. coli*
